# Supplementary material for: Polycationic doping of the LATP ceramic electrolyte for Li-ion batteries
Source: Royal Society of Chemistry journal article supplement (doi:10.1039/d2ra05782d), 2022-01-01
Supplement: d2ra05782d1.pdf [file d2ra05782d1.pdf]

### Supplementary information

Polycationic doping of the LATP ceramic electrolyte for lithium-ion batteries

Aiyem Mashekova<sup>a,b</sup>, Yelnury Baltash<sup>a</sup>, Mukagali Yegamkulov<sup>a,b</sup>, Ivan Trussov<sup>a</sup>, Zhumabay Bakenov<sup>a,b,c,\*</sup>, Aliya Mukanova<sup>a,b,c,\*</sup>

<sup>a</sup> Institute of Batteries LLC, Kabanbay Batyr Ave. 53, Nur-Sultan 010000, Kazakhstan;

<sup>b</sup> Department of Chemical and Materials Engineering, School of Engineering and Digital Sciences, Nazarbayev University, Kabanbay Batyr Ave. 53, Nur-Sultan 010000, Kazakhstan;

<sup>c</sup> National Laboratory Astana, Nazarbayev University, Kabanbay Batyr Ave. 53, Nur-Sultan 010000, Kazakhstan;

\*Electronic Supplementary Information (ESI) available. See DOI: 10.1039/x0xx00000x

Correspondence: [aliya.mukanova@nu.edu.kz](mailto:aliya.mukanova@nu.edu.kz), [zbakenov@nu.edu.kz](mailto:zbakenov@nu.edu.kz)

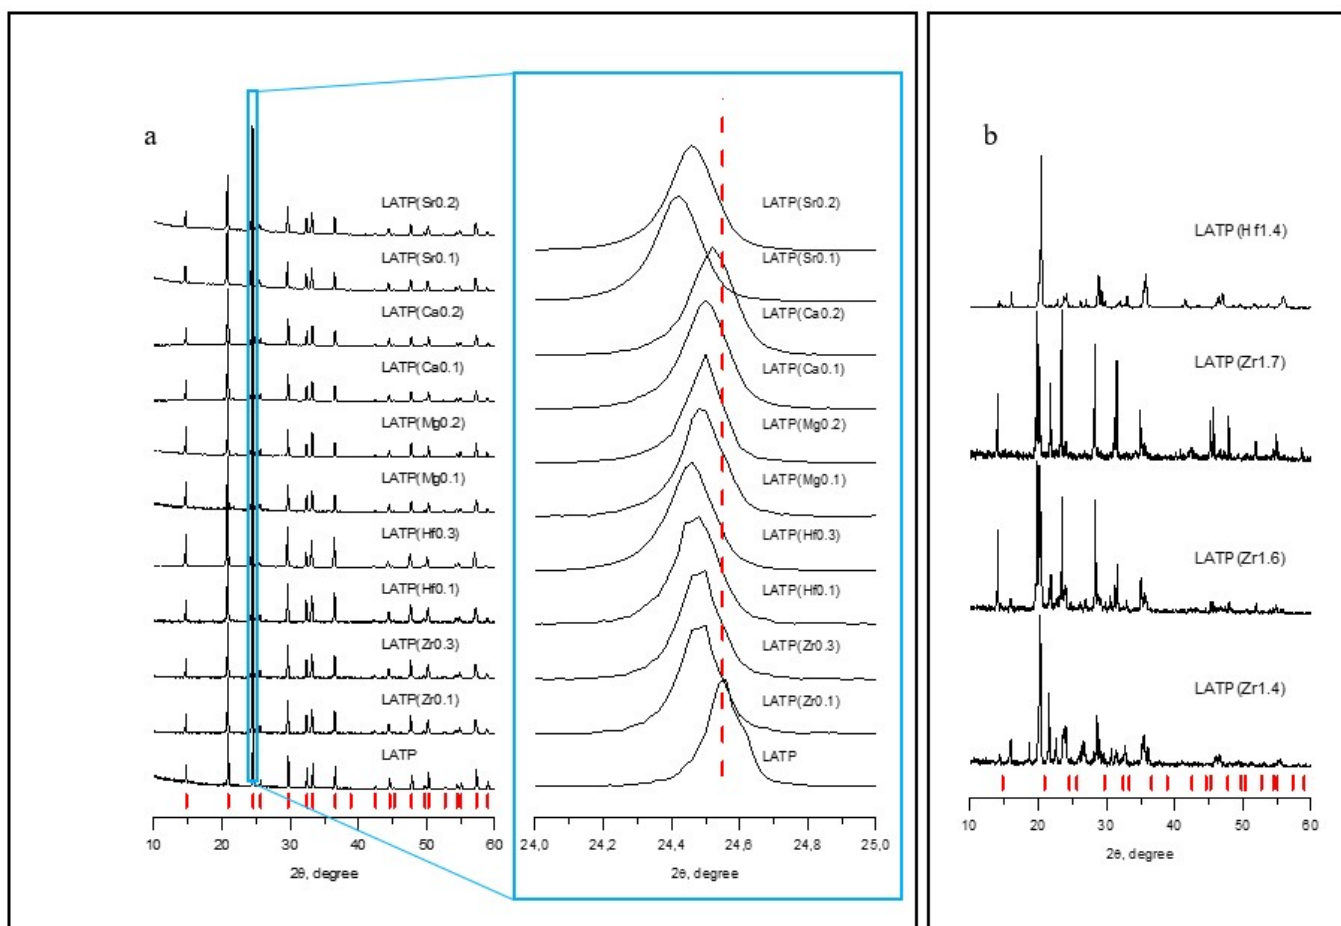

**Figure S1.** Diffraction patterns of doped LATP samples with various levels of cation substitutions: (a) XRD patterns with enlarged peaks around  $2\theta \approx 24.5^\circ$ , (b) XRD patterns with higher tetravalent cation substitution. Red tick marks represent NASICON phase with space group R-3c.

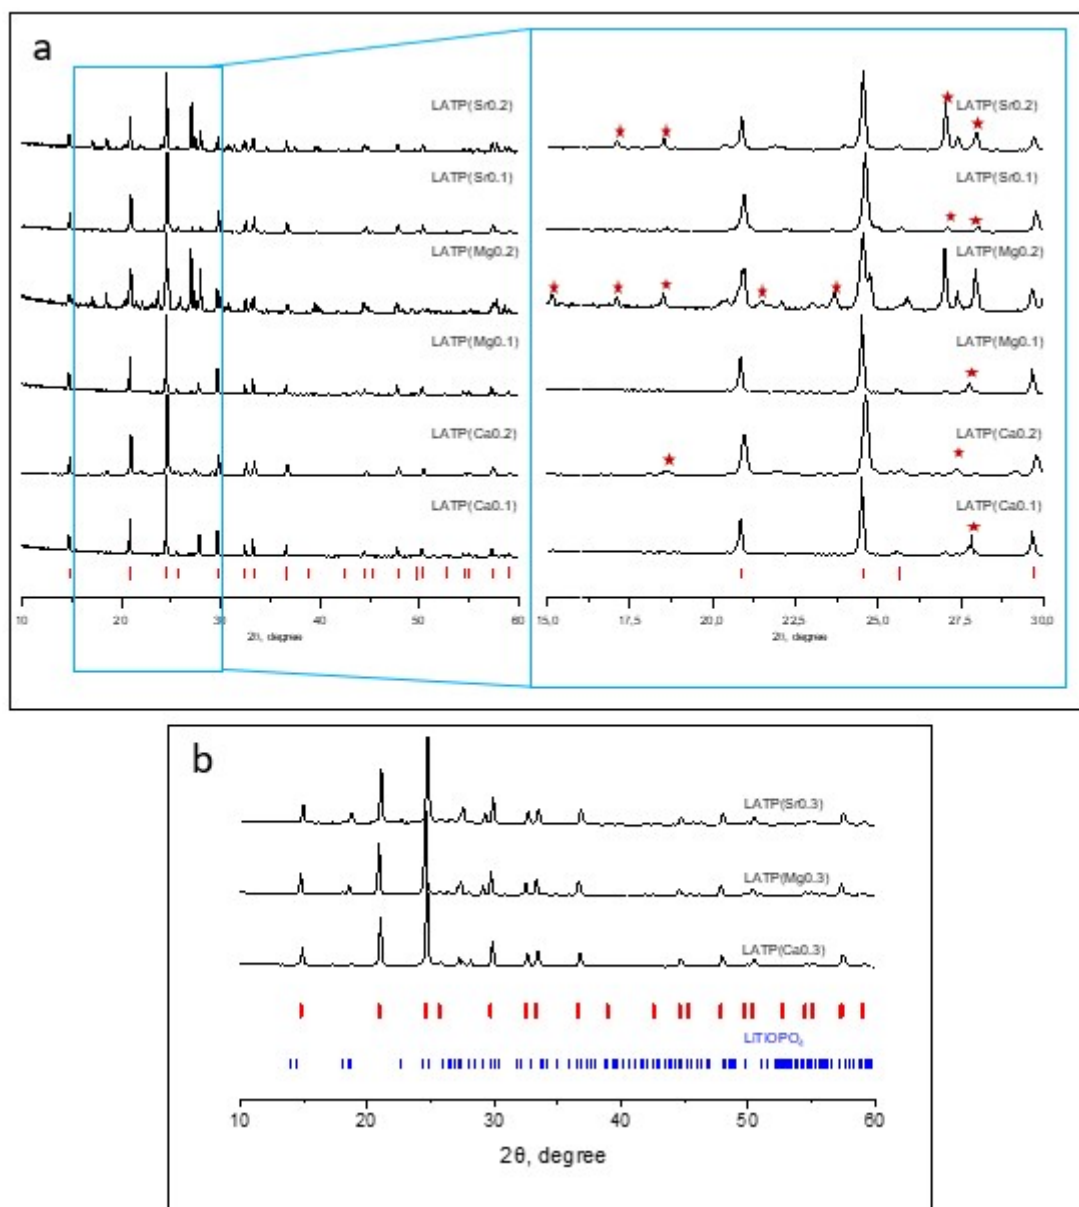

**Figure S2.** Diffraction patterns of doped LATP samples with divalent cations: (a) synthesized by the molten flux method and (b) doping cation is above 0.2 units per formula with solid-state method. The red ticks indicate the NASICON phase with the spatial group R-3c, the red asterisks the impurity phase belonging to  $TiP_2O_7$

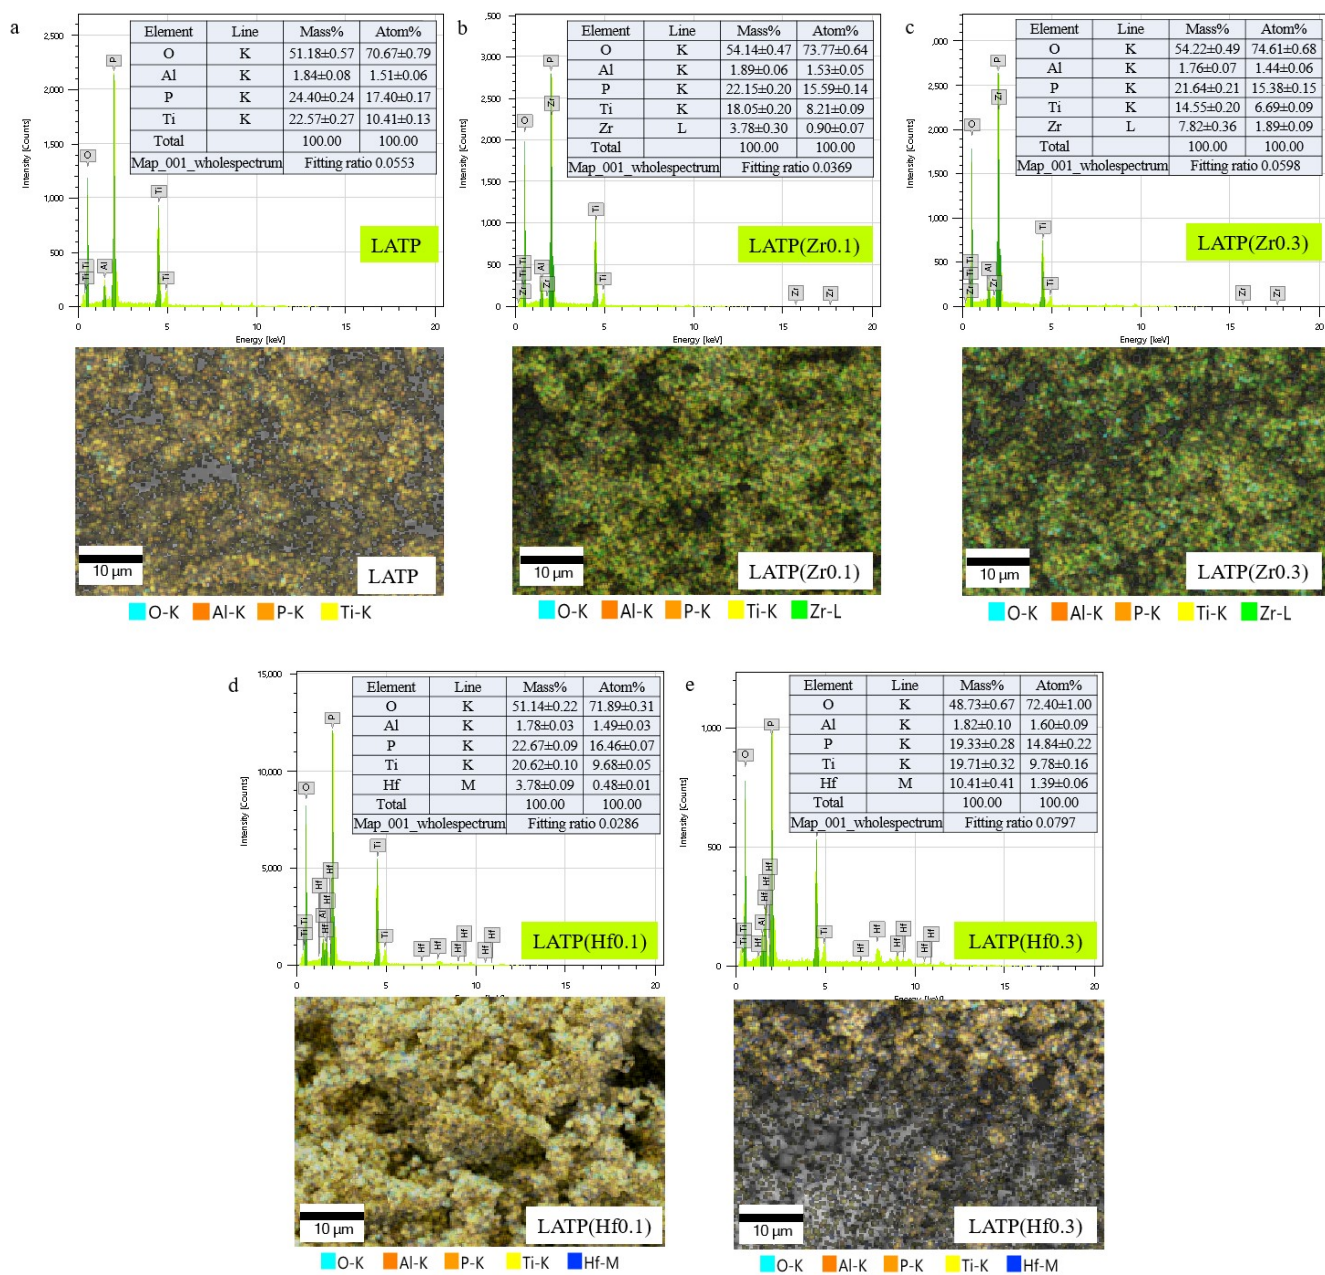

**Figure S3.** EDS spectra of electrolytes: (a) LATP, (b) LATP(Zr0.1), (c) LATP(Zr0.3), (d) LATP(Hf0.1), (e) LATP(Hf0.3)

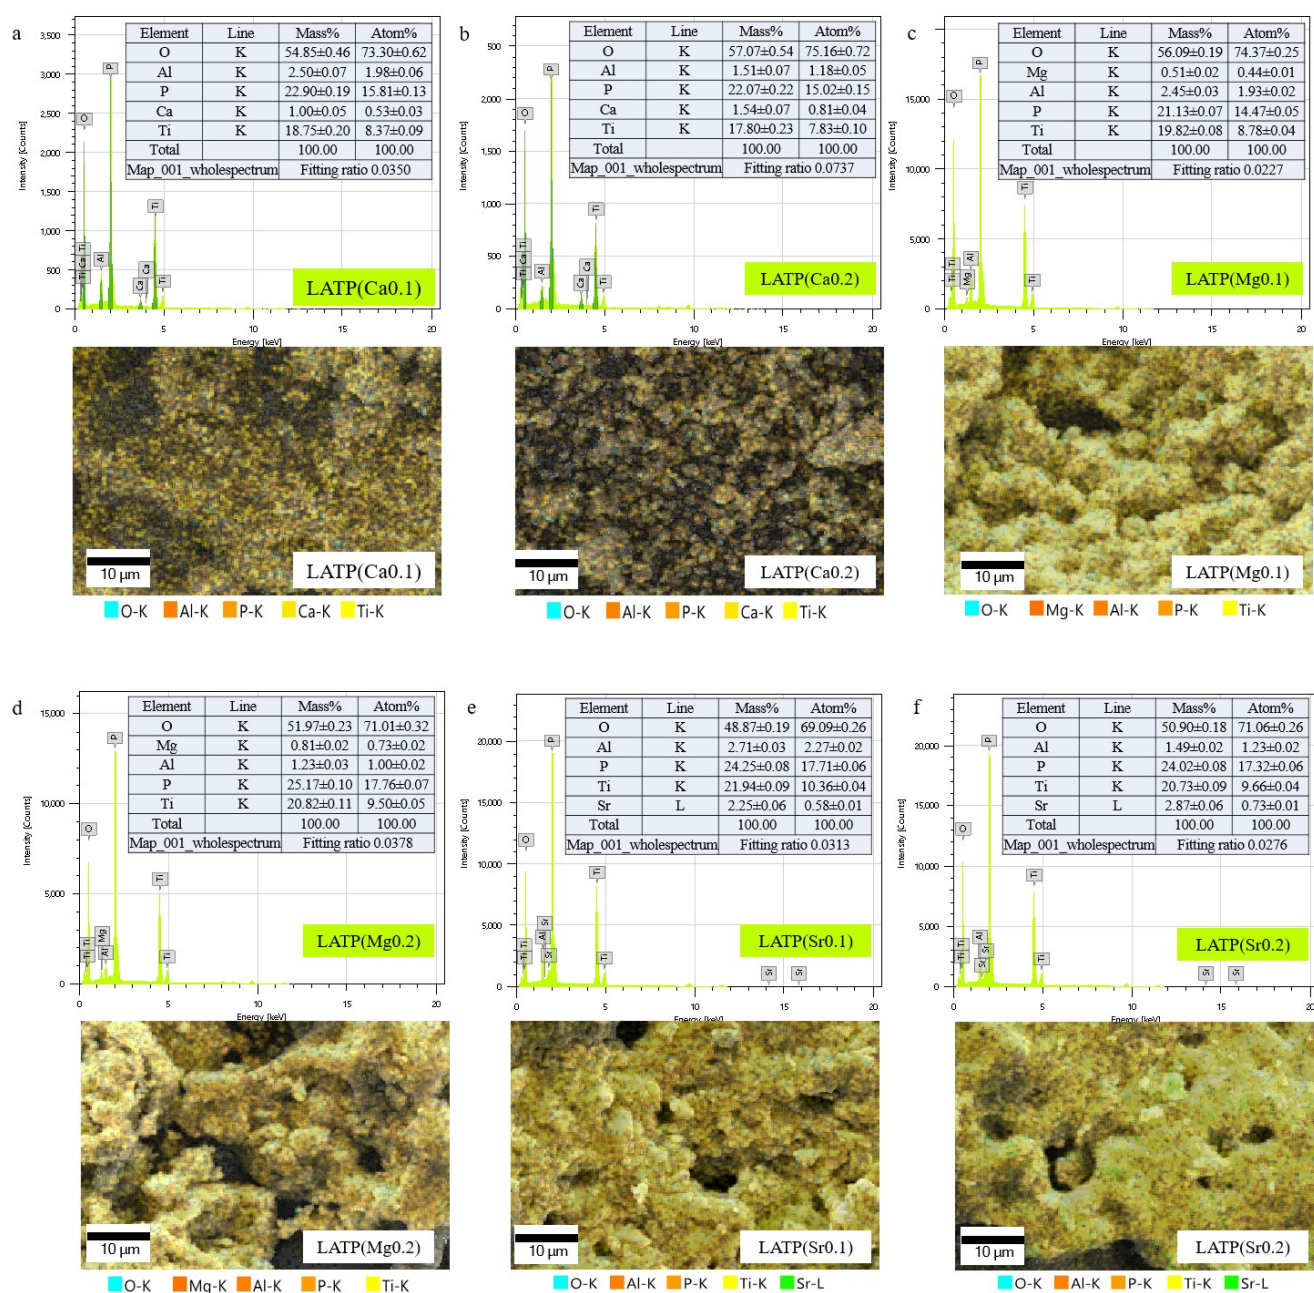

**Figure S4.** EDS spectra of electrolytes: (a) LATP(Ca0.1), (b) LATP(Ca0.2), (c) LATP(Mg0.1), (d) LATP(Mg0.2), (e) LATP(Sr0.1), (f) LATP(Sr0.2)

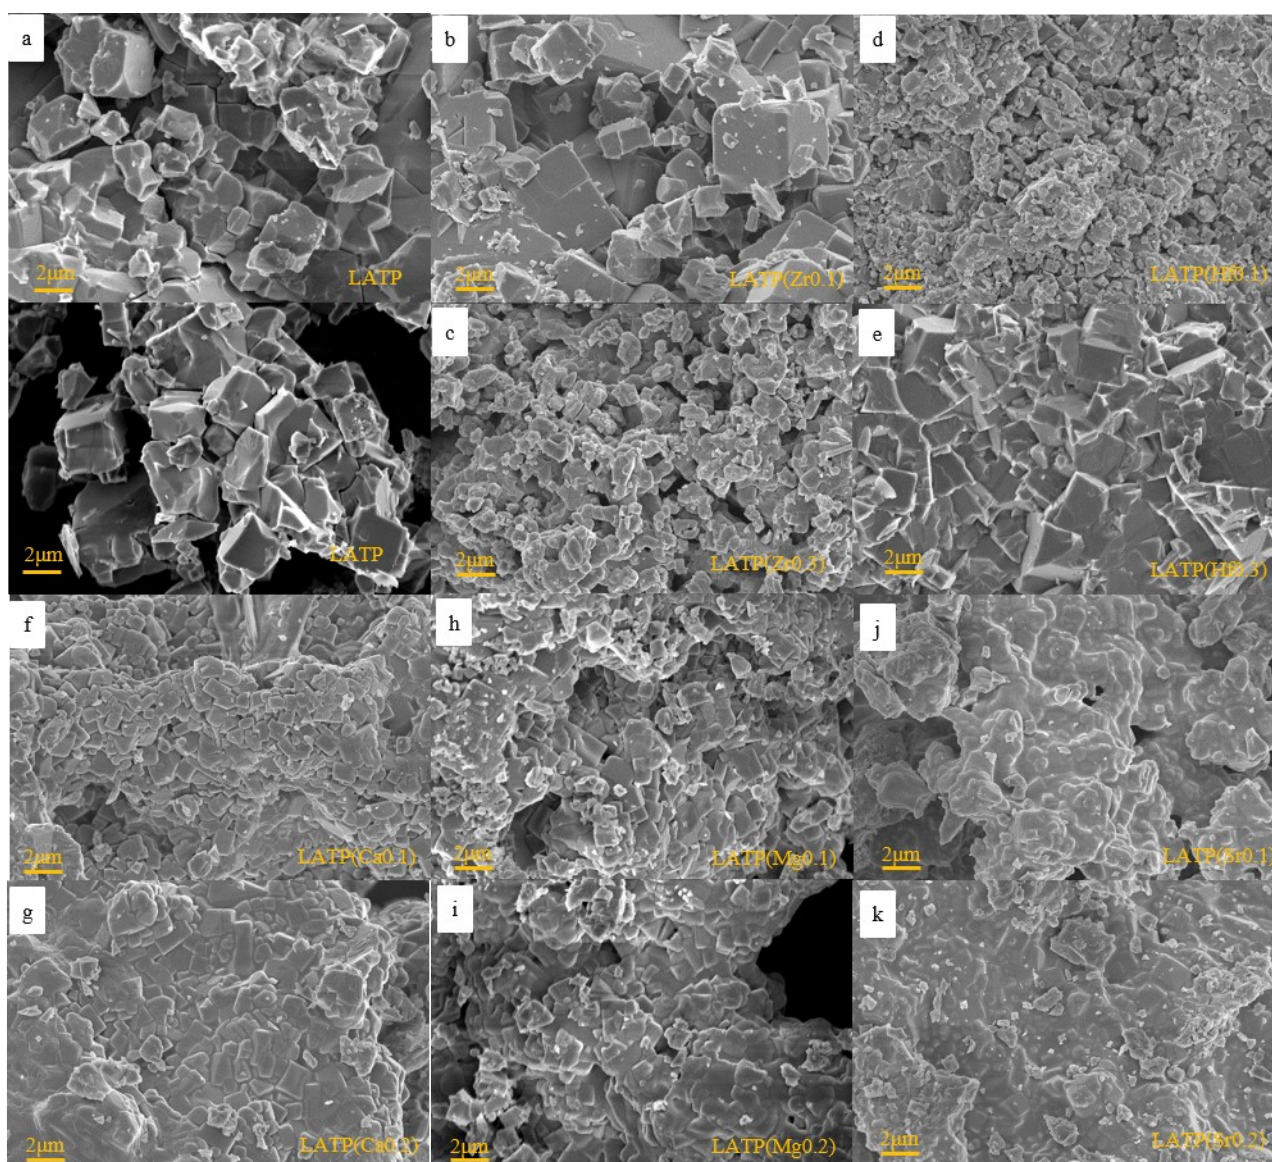

**Figure S5.** SEM images of doped LATP electrolytes: (a) LATP, (b) LATP(Zr0.1), (c) LATP(Zr0.3), (d) LATP(Hf0.1), (e) LATP(Hf0.3), (f) LATP(Ca0.1), (g) LATP(Ca0.2), (h) LATP(Mg0.1), (i) LATP(Mg0.2), (j) LATP(Sr0.1), (k) LATP(Sr0.2)

Table S1 Experimental data of XPS peaks

| Sample      | Ion                             | Peak BE | Height CPS | FWHM eV | Area   | Ti ratio, % | Sample         | Ionic conductivity at 25 °C, S·cm <sup>-1</sup> | Ion                             | Peak BE | Height CPS | FWHM eV | Area  | Ti ratio, % |
|-------------|---------------------------------|---------|------------|---------|--------|-------------|----------------|-------------------------------------------------|---------------------------------|---------|------------|---------|-------|-------------|
| LATP        | Ti <sup>4+</sup> <sub>1/2</sub> | 459,83  | 21212      | 1,71    | 42558  | 100%        | LATP-Li        | 7.86·10 <sup>-5</sup>                           | Ti <sup>4+</sup> <sub>1/2</sub> | 459,98  | 45742      | 1,22    | 65552 | 56%         |
|             | Ti <sup>4+</sup> <sub>3/2</sub> | 465,53  | 8357       | 2,55    | 24978  |             |                |                                                 | Ti <sup>4+</sup> <sub>3/2</sub> | 465,83  | 13545      | 1,61    | 25604 |             |
|             | Ti <sup>3+</sup> <sub>1/2</sub> | 0       | 0          | 0       | 0      | 0%          |                |                                                 | Ti <sup>3+</sup> <sub>1/2</sub> | 457,73  | 15215      | 2,23    | 39814 | 44%         |
|             | Ti <sup>3+</sup> <sub>3/2</sub> | 0       | 0          | 0       | 0      |             |                |                                                 | Ti <sup>3+</sup> <sub>3/2</sub> | 463,79  | 8099       | 3,5     | 33256 |             |
| LATP(Zr0.1) | Ti <sup>4+</sup> <sub>1/2</sub> | 459,05  | 62802      | 1,67    | 122900 | 100%        | LATP(Zr0.1)-Li | 4.7·10 <sup>-5</sup>                            | Ti <sup>4+</sup> <sub>1/2</sub> | 460,1   | 11643      | 1,53    | 21899 | 60%         |
|             | Ti <sup>4+</sup> <sub>3/2</sub> | 464,8   | 22937      | 2,39    | 64297  |             |                |                                                 | Ti <sup>4+</sup> <sub>3/2</sub> | 465,91  | 4488       | 2,05    | 9774  |             |
|             | Ti <sup>3+</sup> <sub>1/2</sub> | 0       | 0          | 0       | 0      | 0%          |                |                                                 | Ti <sup>3+</sup> <sub>1/2</sub> | 459,33  | 4725       | 2,73    | 14128 | 40%         |
|             | Ti <sup>3+</sup> <sub>3/2</sub> | 0       | 0          | 0       | 0      |             |                |                                                 | Ti <sup>3+</sup> <sub>3/2</sub> | 464,73  | 2292       | 3,5     | 7012  |             |
| LATP(Hf0.1) | Ti <sup>4+</sup> <sub>1/2</sub> | 459,78  | 11171      | 1,55    | 37562  | 100%        | LATP(Hf0.1)-Li | 2.41·10 <sup>-5</sup>                           | Ti <sup>4+</sup> <sub>1/2</sub> | 460,19  | 11607      | 1,53    | 20834 | 67%         |
|             | Ti <sup>4+</sup> <sub>3/2</sub> | 465,58  | 4595       | 2,26    | 22505  |             |                |                                                 | Ti <sup>4+</sup> <sub>3/2</sub> | 465,84  | 6061       | 2,38    | 16910 |             |
|             | Ti <sup>3+</sup> <sub>1/2</sub> | 0       | 0          | 0       | 0      | 0%          |                |                                                 | Ti <sup>3+</sup> <sub>1/2</sub> | 459,44  | 4734       | 2,78    | 15458 | 33%         |
|             | Ti <sup>3+</sup> <sub>3/2</sub> | 0       | 0          | 0       | 0      |             |                |                                                 | Ti <sup>3+</sup> <sub>3/2</sub> | 463,59  | 1120       | 2,27    | 2976  |             |
| LATP(Ca0.1) | Ti <sup>4+</sup> <sub>1/2</sub> | 459,35  | 62772      | 1,66    | 122074 | 100%        | LATP(Ca0.1)-Li | 9.02·10 <sup>-5</sup>                           | Ti <sup>4+</sup> <sub>1/2</sub> | 459,87  | 8762       | 1,77    | 18205 | 45%         |
|             | Ti <sup>4+</sup> <sub>3/2</sub> | 465,11  | 23017      | 2,42    | 65312  |             |                |                                                 | Ti <sup>4+</sup> <sub>3/2</sub> | 465,62  | 4277       | 2,19    | 10998 |             |
|             | Ti <sup>3+</sup> <sub>1/2</sub> | 0       | 0          | 0       | 0      | 0%          |                |                                                 | Ti <sup>3+</sup> <sub>1/2</sub> | 458,38  | 6807       | 3,11    | 24866 | 55%         |
|             | Ti <sup>3+</sup> <sub>3/2</sub> | 0       | 0          | 0       | 0      |             |                |                                                 | Ti <sup>3+</sup> <sub>3/2</sub> | 463,74  | 3017       | 2,89    | 10238 |             |
| LATP(Mg0.1) | Ti <sup>4+</sup> <sub>1/2</sub> | 459,74  | 73804      | 1,26    | 109327 | 100%        | LATP(Mg0.1)-Li | 3.01·10 <sup>-6</sup>                           | Ti <sup>4+</sup> <sub>1/2</sub> | 460,18  | 43139      | 1,22    | 61842 | 78%         |
|             | Ti <sup>4+</sup> <sub>3/2</sub> | 465,56  | 25646      | 2,03    | 61000  |             |                |                                                 | Ti <sup>4+</sup> <sub>3/2</sub> | 465,98  | 14095      | 1,86    | 30786 |             |
|             | Ti <sup>3+</sup> <sub>1/2</sub> | 0       | 0          | 0       | 0      | 0%          |                |                                                 | Ti <sup>3+</sup> <sub>1/2</sub> | 458,93  | 6441       | 1,49    | 11282 | 22%         |
|             | Ti <sup>3+</sup> <sub>3/2</sub> | 0       | 0          | 0       | 0      |             |                |                                                 | Ti <sup>3+</sup> <sub>3/2</sub> | 464,27  | 3484       | 3,5     | 14306 |             |
| LATP(Sr0.1) | Ti <sup>4+</sup> <sub>1/2</sub> | 459,38  | 64171      | 1,62    | 122232 | 100%        | LATP(Sr0.1)-Li | 6.91·10 <sup>-5</sup>                           | Ti <sup>4+</sup> <sub>1/2</sub> | 459,67  | 25205      | 2,09    | 61845 | 51%         |
|             | Ti <sup>4+</sup> <sub>3/2</sub> | 465,14  | 23548      | 2,4     | 66276  |             |                |                                                 | Ti <sup>4+</sup> <sub>3/2</sub> | 465,54  | 9442       | 2,19    | 24300 |             |
|             | Ti <sup>3+</sup> <sub>1/2</sub> | 0       | 0          | 0       | 0      | 0%          |                |                                                 | Ti <sup>3+</sup> <sub>1/2</sub> | 457,86  | 25057      | 1,82    | 53330 | 49%         |
|             | Ti <sup>3+</sup> <sub>3/2</sub> | 0       | 0          | 0       | 0      |             |                |                                                 | Ti <sup>3+</sup> <sub>3/2</sub> | 463,7   | 11262      | 2,34    | 30909 |             |

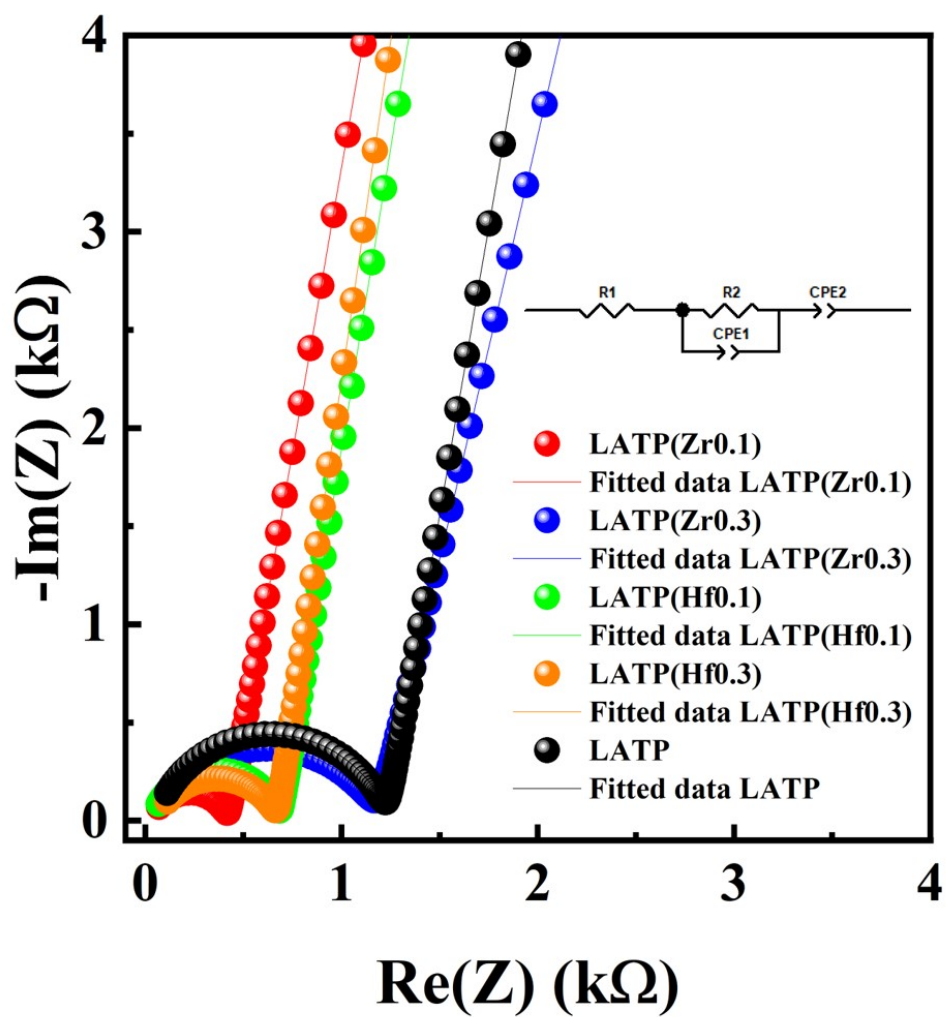

Figure S6. Fitted EIS results of pure and doped LATP electrolytes
